# Supplementary material for: A rapid one-pot synthesis of hierarchical hollow mesoporous CuO microspheres and their catalytic efficiency for the decomposition of H2O2
Source: Royal Society of Chemistry journal article supplement (doi:10.1039/c3ra41242c), 2013-01-01
Supplement: c3ra41242c.pdf [file c3ra41242c.pdf]

## Supporting Information

### **A rapid one-pot synthesis of hierarchical hollow mesoporous CuO microspheres and their catalytic efficiency for the decomposition of H<sub>2</sub>O<sub>2</sub>**

**Sourav Ghosh and Milan Kanti Naskar\***

Sol-Gel Division, CSIR-Central Glass and Ceramic Research Institute, Kolkata 700 032,  
India

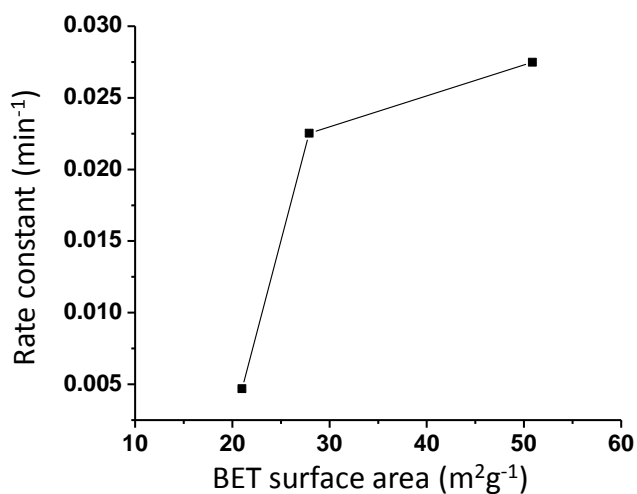

Fig. 1S: Dependence of the rate constants on the BET surface area of the CuO catalysts.

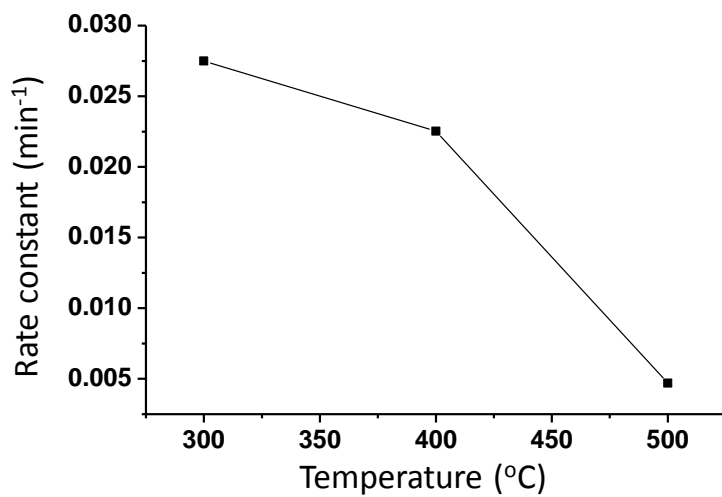

Fig. 2S: Dependence of the rate constants on the calcination temperature of the CuO catalysts.
